# Supplementary material
Source: PubMed Central journal article supplement (PMC3563767)
Supplement: NIHMS429653-supplement-01.pdf [file NIHMS429653-supplement-01.pdf]

**Figure S1**

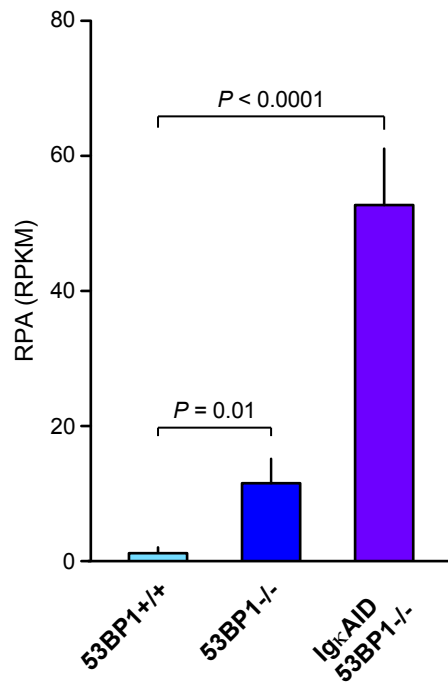

Increase in RPA occupancy at Ig loci in 53BP1+/+ (n = 3), 53BP1-/- (n = 5), and IgκAID\_53BP1-/- (n = 3) B cells activated in the presence of LPS + IL4. RPA ChIP-Seq values at Igμ (chr12:114650000-114668000) and Igγ1 (chr12:114562000-114580000) were used in the comparison. P values were calculated using the unpaired T test.

**Figure S2**

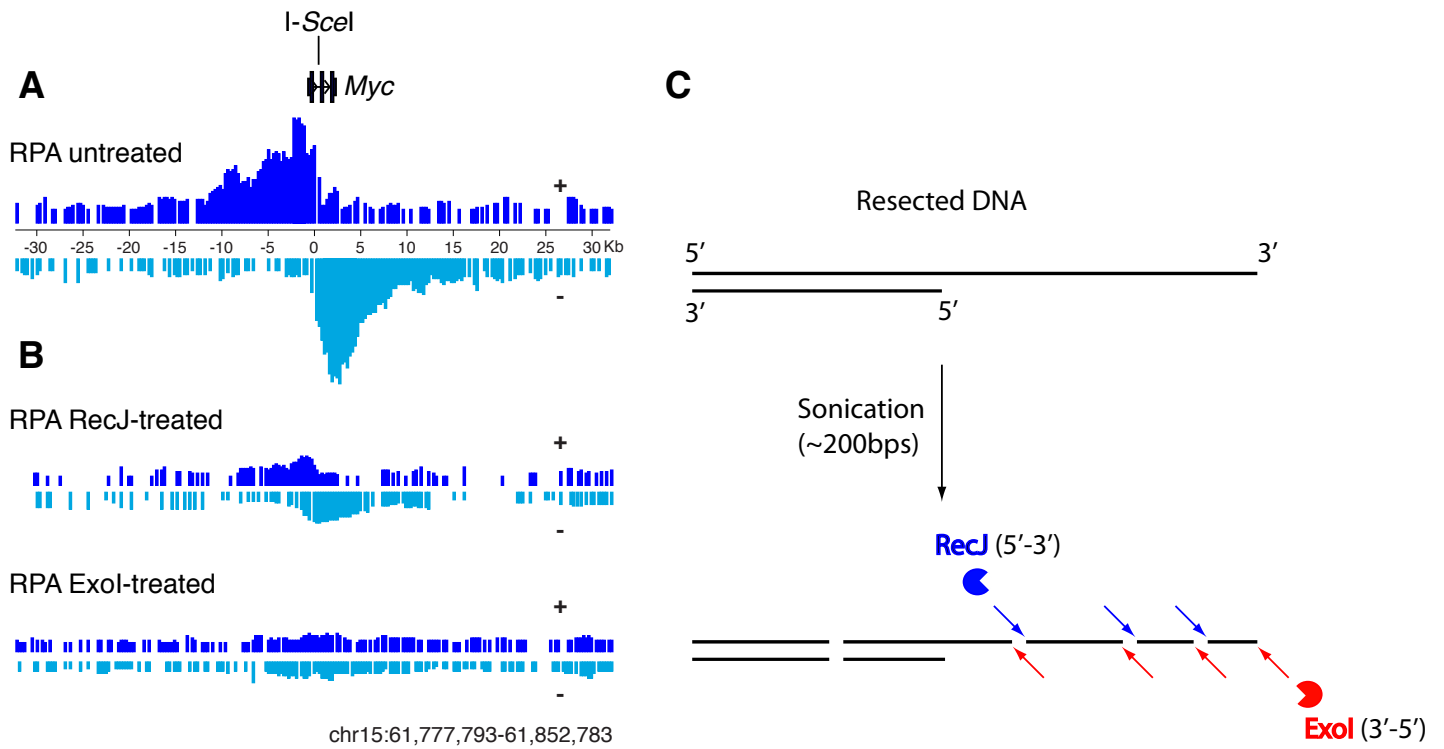

**(A)** RPA-Seq signals resolved into upper (+) and lower (-) strands. **(B)** Treatment of anti-RPA ChIP DNA with *E. coli* Exonuclease I (Exol) or RecJ. DNA samples were isolated from 53BP1<sup>-/-</sup>AID<sup>-/-</sup>Myc<sup>I-SceI</sup> B cells infected with a retrovirus expressing I-SceI homing nuclease. Cells were activated ex-vivo in the presence of LPS+IL-4. Sequence reads per million (RPM) were smoothed with a quadratic Svitzy-Goolay filter 501 nucleotides wide. Untreated sample also shows the extent of resection per kilobase pair. **(C)** Schematics representing RecJ- and Exol-susceptibility of sonicated, resected DNA in RPA-Seq experiments. The model explains why more RPA signal is retained following RecJ nucleolytic activity compared to Exol.

Figure S3

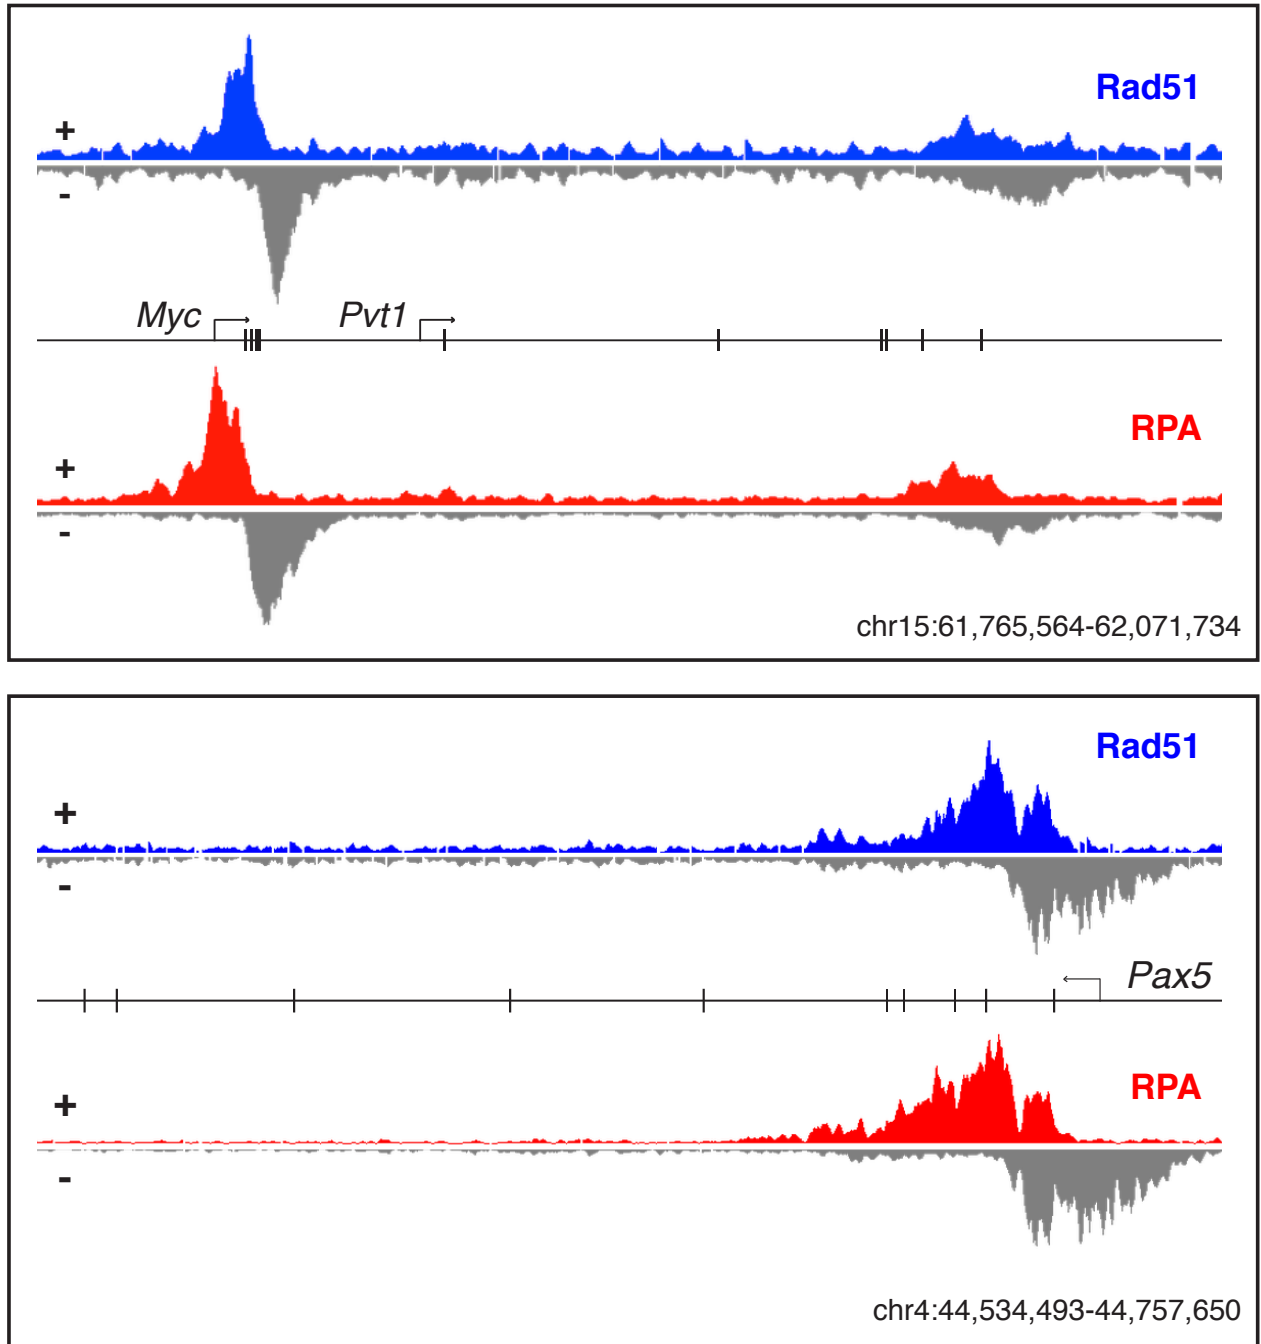

Rad51 occupancy by DNA strand at *Myc-Pvt1* and *Pax5* loci as measured in 53BP1<sup>-/-</sup>-IgkAID B cells activated ex-vivo in the presence of LPS+IL-4.

**Table S1:** ChIP-Seq samples, biological replicates, and comparable experiments used in the manuscript.

| Figure | Panels | Samples                                                                                                                                                                                    | Biological replicates and comparable experiments                                                                                                                                                                                     |
|--------|--------|--------------------------------------------------------------------------------------------------------------------------------------------------------------------------------------------|--------------------------------------------------------------------------------------------------------------------------------------------------------------------------------------------------------------------------------------|
| Fig1   | A      | activatedB_53BP1ko_RPAip_a<br>activatedB_H2AXko_RPAip_a<br>activatedB_H2AXko_UNGko_MSH2ko_RPAip_a                                                                                          | activatedB_53BP1ko_RPAip_b, activatedB_53BP1ko_RPAip_c<br>Figure 4A samples                                                                                                                                                          |
|        | B      | thymocyte_53BP1ko_RPAip_a<br>RAG2 from (Ji et al. Cell, 2010)<br>thymocyte_WT_RPAip_a                                                                                                      | thymocyte_53BP1ko_RPAip_b<br>thymocyte_WT_RPAip_b                                                                                                                                                                                    |
|        | C      | activatedB_ER-IsceI_53BP1ko_AIDko_RPAip_0min<br>activatedB_ER-IsceI_53BP1ko_AIDko_RPAip_30min<br>activatedB_ER-IsceI_53BP1ko_AIDko_RPAip_3h<br>activatedB_ER-IsceI_53BP1ko_AIDko_RPAip_24h |                                                                                                                                                                                                                                      |
| Fig2   | A      | activatedB_AIDtg_53BP1ko_RPAip_a                                                                                                                                                           | activatedB_AIDtg_53BP1ko_RPAip_b, activatedB_AIDtg_53BP1ko_RPAip_c, activatedB_AIDtg_53BP1ko_RPAip_d                                                                                                                                 |
|        | B      | activatedB_AIDtg_53BP1ko_RPAip_a<br>activatedB_AIDtg_53BP1ko_RPAip_ExoI<br>activatedB_AIDtg_53BP1ko_RPAip_RecJf                                                                            | activatedB_AIDtg_53BP1ko_RPAip_b, activatedB_AIDtg_53BP1ko_RPAip_c, activatedB_AIDtg_53BP1ko_RPAip_d<br>FigS1B IsceI ExoI treated sample<br>FigS1B IsceI RecJ treated sample                                                         |
|        | C      | activatedB_WT_PoIIIip_combined                                                                                                                                                             | Data combined from (Pavri et al. Cell, 2010), (Kuchen et al., Immunity, 2010), and (Yamane et al, Nat. Immunology, 2011)                                                                                                             |
|        | D      | The same as Fig 2B                                                                                                                                                                         |                                                                                                                                                                                                                                      |
|        | E      | MEF_I-PpoI_53BP1ko_RPAip                                                                                                                                                                   |                                                                                                                                                                                                                                      |
| Fig3   | A      | activatedB_AIDtg_53BP1ko_RAD51ip_combined                                                                                                                                                  | activatedB_53BP1ko_RAD51ip, activatedB_53BP1ko_SG2M_RAD51ip                                                                                                                                                                          |
|        | B      | activatedB_AIDtg_53BP1ko_RPAip_combined                                                                                                                                                    | Data combined from 4 biological replicates of AIDtg_53BP1ko_RPAip                                                                                                                                                                    |
| Fig4   | A      | activatedB_H2AXko_G1_RPAip_a<br>activatedB_H2AXko_S_RPAip_a<br>activatedB_H2AXko_G2M_RPAip_a                                                                                               | activatedB_53BP1ko_G1_RPAip_a<br>activatedB_53BP1ko_S_RPAip_a<br>activatedB_53BP1ko_SG2M_RPAip_b                                                                                                                                     |
|        | B      | activatedB_WT_G1_gH2AXip_a<br>activatedB_WT_S_gH2AXip_a<br>activatedB_H2AXko_G1_gH2AXip_a<br>activatedB_53BP1ko_G1_gH2AXip_a<br>activatedB_53BP1ko_S_gH2AXip_a                             |                                                                                                                                                                                                                                      |
|        | C      | activatedB_H2AXko_G1_RPAip_a<br>activatedB_H2AXko_S_RPAip_a<br>activatedB_53BP1ko_G2M_gH2AXip_a                                                                                            |                                                                                                                                                                                                                                      |
| Fig5   | A      | activatedB_53BP1ko_G1_RPA_b<br>activatedB_53BP1ko_SG2M_RPA_b<br>activatedB_53BP1ko_ATMI_G1_RPA_b<br>activatedB_53BP1ko_ATMI_SG2M_RPA_combined                                              | activatedB_53BP1ko_G1_RPA_c<br>activatedB_53BP1ko_SG2M_RPA_c<br>activatedB_53BP1ko_ATMI_G1_RPA_c                                                                                                                                     |
|        | C      | thymocyte_53BP1ko_RPAip_a<br>thymocyte_53BP1ko_ATMko_RPAip_a                                                                                                                               | thymocyte_53BP1ko_RPAip_b<br>thymocyte_53BP1ko_ATMko_RPAip_b                                                                                                                                                                         |
|        | D      | activatedB_53BP1ko_RPAip_b<br>activatedB_53BP1ko_ATMko_RPAip_a                                                                                                                             | activatedB_53BP1ko_RPAip_a, activatedB_53BP1ko_RPAip_c<br>activatedB_53BP1ko_ATMko_RPAip_b                                                                                                                                           |
|        | E      | AIDtg_RPA from (Hakim et al. Nature, 2012)<br>AIDwt_RPA from (Hakim et al. Nature, 2012)<br>AIDko_RPA from (Hakim et al. Nature, 2012)<br>activatedB_AIDwt_RAD51ip                         |                                                                                                                                                                                                                                      |
|        | FigS1  | activatedB_53BP1ko_RPAip_b<br>activatedB_WT_RPAip_a<br>activatedB_AIDtg_53BP1ko_RPAip_d                                                                                                    | activatedB_53BP1ko_RPAip_d, activatedB_53BP1ko_RPAip_e, activatedB_53BP1ko_RPAip_f, activatedB_53BP1ko_RPAip_g<br>activatedB_WT_RPAip_b, activatedB_WT_RPAip_c<br>activatedB_AIDtg_53BP1ko_RPAip_e, activatedB_AIDtg_53BP1ko_RPAip_f |
| FigS2  | A      | activatedB_IsceI_53BP1ko_AIDko_RPAip                                                                                                                                                       |                                                                                                                                                                                                                                      |
|        | B      | activatedB_IsceI_53BP1ko_AIDko_RPAip_ExoI_a<br>activatedB_IsceI_53BP1ko_AIDko_RPAip_RecJf_a                                                                                                | Fig2B AIDtg ExoI treated sample<br>Fig2B AIDtg RecJf treated sample                                                                                                                                                                  |
| FigS3  |        | activatedB_AIDtg_53BP1ko_RAD51ip_combined<br>activatedB_AIDtg_53BP1ko_RPAip_combined                                                                                                       |                                                                                                                                                                                                                                      |
